# Supplementary material
Source: HighWire-hosted journal article supplement (http://cmajopen.ca/highwire/filestream/80931/field_highwire_adjunct_files/1/open-2015-0052-original-submission.pdf)
Supplement: open-2015-0052-original-submission.pdf [file open-2015-0052-original-submission.pdf]

## Background

Respiratory Syncytial Virus (RSV) is considered to be the most significant viral pathogen for young children. RSV was responsible for an estimated 3.4 million hospitalizations and 200,000 deaths globally in 2005 in children < 5 years of age (1). Infants in Arctic Canada have extremely high rates of lower respiratory tract infections (LRTIs) (2-6) where RSV has been identified as the major pathogen (6, 7). In the Qikiqtani Region (QIR) of Nunavut, RSV hospitalization rates in the rural communities (without a hospital) in 2002 were 166 per 1000 infants in their first year of life and 328 per 1000 infants who were < 6 months of age.

The majority of Inuit infants in the Canadian Arctic reside in 3 regions; Northwest Territories (NT), Nunavut, which is divided into three sub-regions [Kitikmeot Region (KTR), Kivalliq Region (KQR) and QIR] and Nunavik in northern Quebec. Most of these infants only have access to local health centres, and infants requiring hospitalization are evacuated by air over large distances to regional or tertiary hospitals in more southern parts of Canada. Very high rates of RSV combined with expensive medical evacuations makes RSV hospitalizations the greatest health expenditures for infants in Nunavut (7-9).

Palivizumab, a monoclonal antibody against RSV, was licensed in Canada in 2002. By 2005, government-funded programs were implemented across the Canadian Arctic. Initially palivizumab guidelines included premature birth, significant congenital heart disease (CHD) or chronic lung disease (CLD) (10-13). In 2002 a budget impact analysis (BIA) in QIR examined universal palivizumab prophylaxis in a real cohort of infants of all gestational ages (10). A potential cost savings was found in Inuit infants under 6 months of age during RSV season in the

1  
2  
3 rural communities (7) with a number-needed-to-treat (NNT) of 3.9 per RSV hospital admission  
4 prevented (HAP) (7). Subsequently the Canadian Paediatric Society (CPS) recommended  
5  
6 considering palivizumab for *term* Inuit infants < 6 months of age at the start of the RSV season  
7  
8 and residing in remote communities with a persistent high rate of RSV hospitalization (14, 15).  
9  
10 However, this has not been implemented. It remains unclear which regions in the Canadian  
11  
12 Arctic have the highest costs associated with RSV admissions and could benefit from universal  
13  
14 prophylaxis with palivizumab.  
15  
16  
17  
18  
19  
20  
21

22 This study is an economic evaluation of different palivizumab prophylaxis scenarios using data  
23  
24 from a cohort of healthy term infants who were < 6 months of age at the beginning of the 2009  
25  
26 RSV season across 8 regions of the Canadian Arctic. The actual costs of RSV admission were  
27  
28 compared to the hypothetical costs with universal palivizumab prophylaxis of term infants to  
29  
30 calculate the NNT and cost per HAP. This analysis identifies populations who may benefit most  
31  
32 from palivizumab prophylaxis.  
33  
34  
35  
36  
37  
38

## 39 **Methods**

40  
41 The parent study obtained ethics and internal review from all sites. The study was licensed  
42  
43 through the Aurora Research Institute and the Nunavut Research Institute and had extensive  
44  
45 consultation with Inuit advocacy groups.  
46  
47  
48  
49

### 50 *Surveillance of LRTI admissions*

51  
52 Data were extracted from a 2009 prospective surveillance of all LRTI admissions for infants  
53  
54 residing in the Canadian Arctic in NT, Nunavut, and Nunavik and admitted with LRTIs to  
55  
56  
57  
58  
59  
60

1  
2  
3 regional and tertiary hospitals serving these populations (9). Through this surveillance, all  
4 admissions were captured for infants < 6 months of age. The RSV season in the Canadian Arctic  
5 can be delayed and prolonged. We can confirm that 96% of the total annual number of RSV  
6 admissions for infants < 1 year of age occurred January 1<sup>st</sup> 2009 to June 30<sup>th</sup>, 2009 [14] which is  
7 our defined study period. Infants born < 36 weeks gestational age or with significant underlying  
8 CHD or CLD leaving healthy *term infants* (Figure 1). All data were collected prospectively  
9 except for the QIR, where data were collected retrospectively.  
10  
11  
12  
13  
14  
15  
16  
17  
18  
19  
20

### 21 22 *Microbiology testing*

23  
24 Nasopharyngeal aspirates were collected for all prospectively enrolled infants and processed at  
25 the Regional Virology Laboratory, McMaster University, Hamilton, Ontario (ON) using a viral  
26 multiplex PCR (Luminex Molecular Diagnostics, Toronto, ON) (16) Additionally, the results of  
27 clinical NPA were documented for specimens processed at the Provincial Public Health  
28 Laboratory in Edmonton, Alberta, Cadham Provincial Laboratories, Winnipeg, Manitoba or at  
29 the Microbiology Lab, Montreal Children's Hospital, Montréal, Québec. Additionally some  
30 regional labs performed rapid RSV testing using enzyme-linked immunoassay. An infant was  
31 considered to have an RSV infection if any of the RSV laboratory tests were positive.  
32  
33  
34  
35  
36  
37  
38  
39  
40  
41  
42  
43  
44

### 45 46 *Costs*

47  
48 Costs for each RSV hospitalization, including transportation, hospitalization, parental  
49 accommodation and physician fees, were estimated as previously described (9). Transportation  
50 costs included: 1) cost of medical air evacuation from residential community to regional and/or  
51  
52  
53  
54  
55  
56  
57  
58  
59  
60

1  
2  
3 tertiary hospitals, and 2) return travel back to residential community. Hospital per diem rates  
4  
5 were obtained hospital finance departments or from regional governments.  
6  
7  
8  
9

10 The cost of palivizumab was calculated at \$225.75 per kg based on a quoted price from Abbvie  
11 Canada (\$15.05/mg at a dose of 15 mg/kg) based on weight estimated from CDC growth charts,  
12  
13 with 5% added for wastage [21] and \$50 administration fee per dose. Palivizumab routinely gets  
14  
15 transported with other vaccines on regularly scheduled flights therefore no additional cost for  
16  
17 transportation of palivizumab.  
18  
19  
20  
21

22  
23  
24 This economic evaluation was conducted from the public payer's perspective and included direct  
25 costs associated with RSV prophylaxis and medical care. All costs were based in 2011 Canadian  
26  
27 dollars (1 Canadian \$ = 1 US \$) and were not inflated. The time line is the 6-month RSV season.  
28  
29  
30  
31

### 32 33 34 **Data Analysis**

35  
36  
37  
38 Palivizumab doses were scheduled monthly starting from the last week of December 2008 and  
39  
40 were assumed to provide one month of protection. This analysis assumes that births were equally  
41  
42 distributed across the year (1/12 of term births each month) and that compliance was 100%.  
43  
44  
45  
46

47  
48 The actual costs associated with the 2009 RSV hospital admissions for all healthy term infants  
49  
50 (9) were compared to the estimated cost of palivizumab prophylaxis if provided to all healthy  
51  
52 term infants combined with the estimated decreased cost of RSV admissions with prophylaxis  
53  
54 comparing two models (Figure 1). In both models, infants were eligible to receive palivizumab if  
55  
56  
57  
58  
59  
60

1  
2  
3 they were 6 months of age on Jan 1<sup>st</sup> 2009 or born between Jan 1<sup>st</sup> 2009 and May 31<sup>st</sup> 2009.

4  
5 Model A offered all infants prophylaxis until May 31<sup>st</sup>, 2009 even if they were over 5 months of  
6  
7 age. Model B offered infants prophylaxis only until they reached 5 months of age or until May  
8  
9 31<sup>st</sup> 2009, whichever came earlier. The maximum number of doses was six in both models.  
10  
11

12  
13  
14  
15 The efficacy of palivizumab in healthy term Inuit infants is not known. A randomized controlled  
16  
17 trial demonstrated efficacy of 78% in otherwise healthy preterm infants who were primarily non-  
18  
19 Indigenous (10). A recent study of palivizumab effectiveness in primarily preterm Inuit infants in  
20  
21 Nunavut estimated efficacy to be as high as 96% (17). Therefore, we performed analyses using  
22  
23 both 78% and 96% efficacy. The rates of RSV admission, cost per HAP and NNT were  
24  
25 compared between NT, Nunavik, Nunavut and its three sub-regions. As the 2002 BIA (7)  
26  
27 demonstrated large differences in the NNT and cost HAP in Iqaluit (with a regional hospital)  
28  
29 compared to the smaller rural communities (18) we also performed analyses in Nunavut and  
30  
31 QIK excluding Iqaluit. This resulted in a total of eight regions studied for comparison.  
32  
33  
34  
35  
36  
37  
38  
39

40 Data on annual births was obtained from Statistics Canada or from the territorial governments for  
41  
42 each region (18). In Nunavut, for the 2011/2012, 2012/2013 and 2013/2014 RSV seasons, 61, 94  
43  
44 and 80 infants were offered prophylaxis with palivizumab respectively (Dr. M. Bakie,  
45  
46 Government of Nunavut). This is an average of 9.3% of the birth cohort, with approximately 8%  
47  
48 being < 6 months of age at the beginning of the RSV season. Therefore, we estimated that 8% of  
49  
50 the birth cohort were palivizumab candidates, leaving 92% as healthy term infants. The formula  
51  
52 used to calculate NNT was  $NNT = 1 / \text{Absolute risk reduction}$ . Absolute risk reduction was  
53  
54 defined as the untreated admission RSV rate – ((1-efficacy) x untreated RSV admission rate).  
55  
56  
57  
58  
59  
60

1  
2  
3 Untreated admission rate = #admissions with RSV in those not treated / population at risk [22].  
4  
5

6 The approximate population at risk for Model A was 6/12 of the annual births at the start of the  
7  
8 season with the monthly addition of 1/12 of annual birth  $51/72 \times$  annual births (Table 1). In  
9  
10 Model B, the population at risk was 6/12 of the annual births and remained constant as an  
11  
12 equivalent number of infants outgrew the 6 month age criteria as were born (Table 2).  
13  
14  
15  
16

## 17 **Results**

18  
19  
20  
21  
22 In Model A there were 204 admissions for LRTI in infants born after July 1<sup>st</sup> 2008 and admitted  
23  
24 between January 1<sup>st</sup> and June 30<sup>th</sup> 2009, where 184 (90%) were tested for RSV with 101 positive  
25  
26 results. Eleven of these were excluded (9 preterm, 2 preterm with CHD) resulting in 90  
27  
28 admissions for RSV (Figure 1). In this model a reduction of 78% to 96% efficacy of these  
29  
30 admissions would result in 19.8 to 3.6 revised admissions. In Model B, there were 155  
31  
32 admissions for LRTI who were 6 months of age during the RSV season. 149 were tested (96%)  
33  
34 for RSV with 80 positive results. Six were excluded (5 preterm, 1 preterm with CHD) resulting  
35  
36 in 74 admissions for RSV with 16.3 to 3 a revised admissions. Tables 3 and 4 summarize the  
37  
38 RSV admission rate, cost per HAP, incremental cost per RSV admission avoided, NNT and  
39  
40 number of doses for both models. There was a large range for the incremental cost per HAP  
41  
42 from \$698,135 in NT in Model A, to a cost savings of up to \$48,489 in KTR in Model B. The  
43  
44 NNT also ranged from 77.2 in NT to 3.2 in KTI. Model B had much lower cost per HAP, and  
45  
46 lower NNTs in all categories. Model A had 1.6 times the expense and resulted in 1.4 times the  
47  
48 doses of palivizumab being administered as Model B.  
49  
50  
51  
52  
53  
54  
55  
56  
57  
58  
59  
60

## Interpretation

In this study, we used two different models to assess the impact of universal prophylaxis in Arctic Canada. Model A was 60% more expensive and resulted in 40% more doses being administered than Model B, where prophylaxis was discontinued when the infant reached 5 months of age. Model B had much lower costs per admission avoided and lower NNTs in all categories and appeared to be more cost effective. This is explained by reduced RSV hospitalizations with increasing age. In implementing palivizumab in the Canadian Arctic to Inuit infants, Model B is more cost effective and is the preferred model.

The CPS guidelines recommend that term Inuit infants < 6 months of age at the start of RSV season and residing in remote communities with a persistent high rate of RSV hospitalizations should be considered for palivizumab prophylaxis (14, 15). The current study informs and supports the CPS recommendation. When comparing the rates of RSV admissions across the Canadian Arctic, there is a great heterogeneity. NT, despite a similar birth rate, had one quarter the rates of RSV admission compared to Nunavut, and one tenth the rate of KTR. In addition in NT, a NNT of 44.3 to 54.5 to prevent one RSV admission translates into a cost of \$327,000 per HAP. This analysis suggests that KTR had a NNT of only 3.2 to 4 with a cost savings of up to almost \$50,000 per HAP. To our knowledge, this degree of cost savings from palivizumab has not been described in the literature. Even in KQR, the NNT is 8.4 to 10.3 with a possible cost savings of almost \$3,000 per HAP (9). This data provides very strong evidence that RSV prophylaxis is cost effective in these regions. The rates of RSV admission are also extremely high in Nunavik, with a low NNT of 5 to 6.1. However the costs associated with medical

1  
2  
3 evacuations are lower with shorter distances so the cost per HAP is \$16,000 to \$25,000 per HAP.  
4  
5 This cost is comparable to the estimated cost of palivizumab for standard indications. For  
6  
7  
8 example, the incremental cost of palivizumab to prevent one day of hospitalization was \$15,514  
9  
10 per child per RSV season in a study of Canadian children with CHD (19). Universal prophylaxis  
11  
12 in QIR did not appear to be cost effective, however this should be interpreted with caution as  
13  
14 RSV testing was incomplete for this region. As only one admission came from Iqaluit, there may  
15  
16 be a protective factor of living in this larger community (6); exclusion of Iqaluit would allow for  
17  
18 cost savings to be transferred to areas in higher need.  
19  
20  
21  
22  
23

24 The rates of RSV admission in KTR and Nunavik are high for these otherwise healthy term  
25  
26 infants with no typical risk factors for severe RSV. Some of this risk may be explained by  
27  
28 factors such as multiple siblings, overcrowding, smoking, poverty, food insecurity and decreased  
29  
30 access to health care (6, 20) (21). The rates of RSV admission and severity of disease in Inuit  
31  
32 infants communities in Nunavut and Nunavik are higher than in preterm infants or those with  
33  
34 CLD or CHD (15) infants who are currently eligible for RSV prophylaxis in Canada (15).  
35  
36  
37  
38  
39  
40

41 A systematic literature review of pharmacoeconomic analyses of international palivizumab  
42  
43 strategies for RSV in different regions of the world found variability in results, with a favourable  
44  
45 outcome in some populations but not all and variability in the tolerance for costs among  
46  
47 countries and healthcare settings (22). In general, an incremental cost-effectiveness ratio (ICER)  
48  
49 threshold of \$50,000 CDN per quality adjusted life-years (QALY) is commonly accepted in  
50  
51 North America (22). An analysis of cost effectiveness of palivizumab prophylaxis in term Inuit  
52  
53 infants under 6 months of age in QIR in 2002, estimated the ICER at \$24,750/QALY and seen as  
54  
55  
56  
57  
58  
59  
60



1  
2  
3 a dominant (cost saving) strategy in rural infants (23). Australian Indigenous infants also have  
4  
5 elevated rates of RSV, however the transportation costs were not substantial resulting in a cost  
6  
7 per HAP of \$70,000 to \$90,000 (Australian) (24).  
8  
9

### 10 11 12 13 14 15 **Limitations:**

16  
17 This study likely underestimates the costs and the number of admissions related to RSV. There  
18  
19 may be long-term morbidities from RSV hospitalizations, resulting in further costs. Not all the  
20  
21 LRTI admissions had viral testing, with lower proportions in QIR, possibly underestimating the  
22  
23 cases of RSV. It is possible that some infants may have been hospitalized outside the typical  
24  
25 referral patterns. There were no additional costs added for evening or weekend assessment fees,  
26  
27 emergency visits or resuscitations, surgical procedures, readmissions, medications and societal  
28  
29 costs. Ideally more than one year of data would be analyzed to ensure the robustness of the  
30  
31 findings, but previous studies in the areas with the highest RSV admission rates have yielded  
32  
33 similar results (2, 4, 7, 9).  
34  
35  
36  
37  
38  
39  
40

### 41 **Conclusion**

42  
43 This study demonstrates great variability in the rates of RSV admission and cost per HAP in the  
44  
45 Canadian Arctic. A model universal palivizumab prophylaxis of term infants stopping at 5  
46  
47 months of age was more cost effective than continuing to the end of the season. Universal  
48  
49 prophylaxis of term infants KTR was projected to result in a significant cost savings. In KQR  
50  
51 and Nunavik, the NNT and cost HAP were low. This information provides further justification  
52  
53 for consideration of RSV prophylaxis in these high risk communities.  
54  
55  
56  
57  
58  
59  
60

## References

1. Nair H, Nokes DJ, Gessner BD, Dherani M, Madhi SA, Singleton RJ, et al. Global burden of acute lower respiratory infections due to respiratory syncytial virus in young children: a systematic review and meta-analysis. *Lancet*. 2010;375(9725):1545-55.
2. Banerji A. High rates of hospitalisation for bronchiolitis in Inuit children on Baffin Island. *Int J Circumpolar Health*. 2001;60(3):375-9.
3. Banerji A, Bell A, Mills EL, McDonald J, Subbarao K, Stark G, et al. Lower respiratory tract infections in Inuit infants on Baffin Island. *Cmaj*. 2001;164(13):1847-50.
4. Young M, Kandola K, Mitchell R, Leamon A. Hospital admission rates for lower respiratory tract infections in infants in the Northwest Territories and the Kitikmeot region of Nunavut between 2000 and 2004. *Paediatr Child Health*. 2007;12(7):563-6.
5. Carson JB, Postl BD, Spady D, Schaefer O. Lower respiratory tract infections among Canadian Inuit Children. *International Journal of Circumpolar Health*. 1984;84:226-8.
6. Banerji A, Greenberg D, White LF, Macdonald WA, Saxton A, Thomas E, et al. Risk factors and viruses associated with hospitalization due to lower respiratory tract infections in Canadian Inuit children : a case-control study. *Pediatr Infect Dis J*. 2009;28(8):697-701.
7. Banerji A, Lanctot KL, Paes BA, Masoud ST, Tam DY, Macdonald WA, et al. Comparison of the cost of hospitalization for respiratory syncytial virus disease versus palivizumab prophylaxis in Canadian Inuit infants. *Pediatr Infect Dis J*. 2009;28(8):702-6.
8. Creery D, Lyer P, Samson L, Coyle D, Osborne G, MacDonald A. Costs associated with infant bronchiolitis in the Baffin region of Nunavut. *Int J Circumpolar Health*. 2005;64(1):38-45.
9. Banerji A, Panzov V, Robinson J, Young M, Ng K, Mamdani M. The cost of lower respiratory tract infections hospital admissions in the Canadian Arctic. *Int J Circumpolar Health*. 2013;72.
10. The IMPact-RSV Study Group. Palivizumab, a humanized respiratory syncytial virus monoclonal antibody, reduces hospitalization from respiratory syncytial virus infection in high-risk infants. The IMPact-RSV Study Group. *Pediatrics*. 1998;102(3 Pt 1):531-7.
11. Revised indications for the use of palivizumab and respiratory syncytial virus immune globulin intravenous for the prevention of respiratory syncytial virus infections. *Pediatrics*. 2003;112(6 Pt 1):1442-6.
12. Palivizumab and respiratory syncytial virus immune globulin intravenous for the prophylaxis of respiratory syncytial virus infection in high risk infants. *Paediatr Child Health*. 1999;4(7):474-89.
13. Statement on the recommended use of monoclonal anti-RSV antibody (palivizumab). Canada communicable disease report = Releve des maladies transmissibles au Canada. 2003;29:1-15.
14. Samson L, Canadian Pediatric Society. Prevention of respiratory syncytial virus infection *Paediatrics & Child Health*. 2009;14(8):521-6.
15. Goldberg AC, Hopkins PN, Toth PP, Ballantyne CM, Rader DJ, Robinson JG, et al. Familial hypercholesterolemia: screening, diagnosis and management of pediatric and adult patients: clinical guidance from the National Lipid Association Expert Panel on Familial Hypercholesterolemia. *J Clin Lipidol*. 2011;5(3):133-40.

16. Mahony J, Chong S, Merante F, Yaghoubian S, Sinha T, Lisle C, et al. Development of a respiratory virus panel test for detection of twenty human respiratory viruses by use of multiplex PCR and a fluid microbead-based assay. *J Clin Microbiol.* 2007;45(9):2965-70.
17. Banerji A, Panzov V, Young M, Lee BE, Mamdani M, Giles BL, et al. The real-life effectiveness of palivizumab for reducing hospital admissions for respiratory syncytial virus in infants residing in Nunavut. *Canadian respiratory journal : journal of the Canadian Thoracic Society.* 2014;21(3):185-9.
18. statistics Canada. Population Cencus Profile Ottawa2011 [cited 2014 August 7th 2014]. Available from: <http://www12.statcan.gc.ca/census-recensement/2011/dp-pd/prof/index.cfm?Lang=E>.
19. Harris KC, Anis AH, Crosby MC, Cender LM, Potts JE, Human DG. Economic Evaluation of Palivizumab in Children With Congenital Heart Disease: A Canadian Perspective. *Canadian Journal of Cardiology.*27(4):523.e11-.e15.
20. Carbonell-Estrany X, Fullarton J, Rodgers-Gray B, Gooch K, Vo P, Figueras-Aloy J. Can we improve the targeting of respiratory syncytial virus (RSV) prophylaxis in infants born 32-35 weeks' gestational age with more informed use of risk factors? *J Matern Fetal Neonatal Med.* 2014;14:1-9.
21. Egeland GM, Pacey A, Cao Z, Sobol I. Food insecurity among Inuit preschoolers: Nunavut Inuit Child Health Survey, 2007-2008. *Cmaj.* 2010;182(3):243-8.
22. Hussman JM, Li A, Paes B, Lanctot KL. A review of cost-effectiveness of palivizumab for respiratory syncytial virus. *Expert Rev Pharmacoecon Outcomes Res.* 2012;12(5):553-67.
23. Tam DY, Banerji A, Paes BA, Hui C, Tarride JE, Lanctot KL. The cost effectiveness of palivizumab in term Inuit infants in the Eastern Canadian Arctic. *J Med Econ.* 2009;12(4):361-70.
24. Reeve CA, Whitehall JS, Buettner PG, Norton R, Reeve DM, Francis F. Cost-effectiveness of respiratory syncytial virus prophylaxis with palivizumab. *J Paediatr Child Health.* 2006;42(5):253-8.

Figure 1 Comparing Model A and B for Palivizumab Prophylaxis for Term Infant across the Canadian Arctic

Model A

Model B

Date of birth Jul 1<sup>st</sup> 2008 – May 31<sup>st</sup> 2009  
admitted Jan-June 2009

Age at admission 0-182 days (< 6 months)  
Admitted Jan-June 2009

204 LRTI admissions  
184 tested for RSV  
101 positives

159 LRTI admissions  
149 tested for RSV  
80 positives

Excluded 11  
9 <36 weeks,  
2 <36 weeks and CHD

Excluded 6  
5 <36 weeks,  
1 <36 weeks and CHD

N=90

N=74

Compared in Each Region

Actual costs for RSV admissions in  
each region with above criteria

Actual costs for RSV admissions in  
each region with above criteria

Cost of RSV  
admissions with  
78% reduction

Cost of RSV  
admissions with  
96% reduction

Cost of RSV  
admissions with  
78% reduction

Cost of RSV  
admissions with  
96% reduction

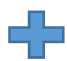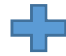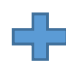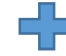

Cost of palivizumab  
for all healthy  
infants born after  
July 1<sup>st</sup> 2008 until  
May 31<sup>st</sup> 2009

Cost of palivizumab  
for all healthy  
infants born after  
July 1<sup>st</sup> 2008 until  
May 31<sup>st</sup> 2009

Cost of palivizumab  
for all healthy  
infants ≤ 5 months  
age or until May  
31<sup>st</sup> 2009

Cost of palivizumab  
for all healthy  
infants < 5 months  
age or until May  
31<sup>st</sup> 2009

Table 1 Model A: Cost, Doses and Population at Risk for Universal Palivizumab Prophylaxis for Healthy Term Infants for Maximum 6 months where Palivizumab Discontinued by May 31<sup>st</sup> 2009

Costs per dose per eligible healthy term infant each month\*

| Age category, weight (kg) | December 2008 | January 2009 | February 2009 | March 2009 | April 2009 | May 2009 |          |
|---------------------------|---------------|--------------|---------------|------------|------------|----------|----------|
| Birth (3.5)               | \$880         | \$880        | \$880         | \$880      | \$880      | \$880    |          |
| 1 month (4.3)             | \$1,069       | \$1,069      | \$1,069       | \$1,069    | \$1,069    | \$1,069  |          |
| 2 month (5.05)            | \$1,247       | \$1,247      | \$1,247       | \$1,247    | \$1,247    | \$1,247  |          |
| 3 month (5.75)            | \$1,413       | \$1,413      | \$1,413       | \$1,413    | \$1,413    | \$1,413  |          |
| 4 month (6.45)            | \$1,579       | \$1,579      | \$1,579       | \$1,579    | \$1,579    | \$1,579  |          |
| 5 month (7.0)             | \$1,709       | \$1,709      | \$1,709       | \$1,709    | \$1,709    | \$1,709  |          |
| 6 month (7.55)            | x             | \$1,840      | \$1,840       | \$1,840    | \$1,840    | \$1,840  |          |
| 7 month (8.05)            | x             | x            | \$1,958       | \$1,958    | \$1,958    | \$1,958  |          |
| 8 month (8.45)            | x             | x            | x             | \$2,053    | \$2,053    | \$2,053  |          |
| 9 month (8.85)            | x             | x            | x             | x          | \$2,148    | \$2,148  |          |
| 10 month (9.25)           | x             | x            | x             | x          | x          | \$2,243  |          |
|                           |               |              |               |            |            |          | SUM      |
| Sum                       | \$7,897       | \$9,737      | \$11,695      | \$13,748   | \$15,896   | \$18,139 | \$77,112 |
| Dose categories per month | 6             | 7            | 8             | 9          | 10         | 11       | 51       |

Eligible infants for palivizumab include health term infants who would be less than 6 months of age by Jan 1st 2009 (born July 1<sup>st</sup> 2008 to end of May 31<sup>st</sup> 2009) and discontinued by May 31<sup>st</sup> 2009.

\*based on 15 mg/kg at \$15.05 per mg +5% wastage + \$50 administration fee/dose

The annual healthy births (AHB) are term infants without congenital heart disease or chronic lung disease born in 2009.

\*Annual cost per region =sum of monthly costs x 1/12 AHB =\*\$6,423.82 x AHB

monthly doses= doses categories per months x 1/12 AHB

Annual doses = 51 x 1/12 annual healthy births = 4.25 AHB

Population at risk = 51/72 of AHB

\*actual calculation \$6,423.82 based on costs on table 1 (above table rounded off)

Table 2: Cost, Doses and Population at Risk for Universal Palivizumab Prophylaxis for Infants for Maximum 6 months Protection (last does 5 months of age or May 2009)

| Age                       | Costs per dose per eligible healthy term child each month* |         |         |         |         |         | Sum      |
|---------------------------|------------------------------------------------------------|---------|---------|---------|---------|---------|----------|
|                           | Dec-08                                                     | Jan-09  | Feb-09  | Mar-09  | Apr-09  | May-09  |          |
| birth                     | \$880                                                      | \$880   | \$880   | \$880   | \$880   | \$880   |          |
| 1 month                   | \$1,069                                                    | \$1,069 | \$1,069 | \$1,069 | \$1,069 | \$1,069 |          |
| 2 month                   | \$1,247                                                    | \$1,247 | \$1,247 | \$1,247 | \$1,247 | \$1,247 |          |
| 3 month                   | \$1,413                                                    | \$1,413 | \$1,413 | \$1,413 | \$1,413 | \$1,413 |          |
| 4 month                   | \$1,579                                                    | \$1,579 | \$1,579 | \$1,579 | \$1,579 | \$1,579 |          |
| 5 month                   | \$1,709                                                    | \$1,709 | \$1,709 | \$1,709 | \$1,709 | \$1,709 |          |
| 6 month                   | x                                                          | x       | x       | x       | x       | x       |          |
| 7 month                   | x                                                          | x       | x       | x       | x       | x       |          |
| 8 month                   | x                                                          | x       | x       | x       | x       | x       |          |
| 9 month                   | x                                                          | x       | x       | x       | x       | x       |          |
| 10 month                  | x                                                          | x       | x       | x       | x       | x       |          |
| 11 months                 | x                                                          | x       | x       | x       | x       | x       |          |
| Sum                       | \$7,897                                                    | \$7,897 | \$7,897 | \$7,897 | \$7,897 | \$7,897 | \$47,382 |
| Dose categories per month | 6                                                          | 6       | 6       | 6       | 6       | 6       | 36       |

Eligible infants for palivizumab include health term infants who would be less than 6 months of age by January 1st 2009 or born before May 31st 2014. Model assumes that an equivalent number of infants are born as outgrow the age criteria.

\*based on 15 mg/kg at \$15.05 per mg +5% wastage + \$50 administration fee/dose

The annual healthy births (AHB) are term infants without congenital heart disease or chronic lung disease born in 2009.

Annual cost per region = \$7,897 x 6/12 AHB =\*\$3,947.29AHB

Monthly doses = dose categories per month x 1/12AHB = 6/12 AHB

Annual doses = 6 x 6/12 AHB

Population at risk = 36/72 (.5) of AHB

\*Above table rounded off

Table 3: Model A - Palivizumab prophylaxis for all healthy term infants who were less than 6 months of age at the beginning of RSV season or born during RSV season with palivizumab continued to the end of RSV season across the Canadian Arctic, comparing 78% and 96% palivizumab effectiveness

| Location                                                                    | NT          | NU          | NU Without Iqaluit | KTR         | KQR         | QIR         | QIR without Iqaluit | NK          |                           |
|-----------------------------------------------------------------------------|-------------|-------------|--------------------|-------------|-------------|-------------|---------------------|-------------|---------------------------|
| A Total annual births in 2009                                               | 739         | 816         | 701                | 114         | 245         | 457         | 342                 | 250         |                           |
| B Healthy term births*                                                      | 679.9       | 750.7       | 644.9              | 104.9       | 225.4       | 420.4       | 314.6               | 230         |                           |
| C Total number of RSV admissions documented in 2009 in healthy term infants | 8           | 52          | 51                 | 22          | 18          | 12          | 11                  | 30          |                           |
| E Estimated rate of RSV admissions per 1000 live births**                   | 16.6        | 97.8        | 111.6              | 296.1       | 112.7       | 40.3        | 49.4                | 184.1       |                           |
| F Number of doses of palivizumab                                            | 2890        | 3190        | 2741               | 446         | 958         | 1787        | 1337                | 978         |                           |
| <b>Estimated Costs for RSV admissions in healthy term infants</b>           |             |             |                    |             |             |             |                     |             |                           |
| G Average cost per admission                                                | \$1,794     | \$55,214    | \$56,011           | \$68,017    | \$60,811    | \$23,347    | \$24,145            | \$21,071    | Formatted: Font: Not Bold |
| H Total cost of admissions                                                  | \$14,353    | \$2,871,137 | \$2,856,561        | \$1,496,365 | \$1,094,603 | \$280,169   | \$265,593           | \$632,139   | Formatted: Font: Not Bold |
| I Estimated cost of Palivizumab in Model A                                  | \$4,367,555 | \$4,822,362 | \$4,142,722        | \$673,859   | \$1,447,929 | \$2,700,574 | \$2,020,934         | \$1,477,479 | Formatted: Font: Not Bold |
| <b>Model with 78% effectiveness for healthy term infants</b>                |             |             |                    |             |             |             |                     |             |                           |
| J Revised total number of RSV admissions                                    | 1.8         | 11.4        | 11.2               | 4.8         | 4.0         | 2.6         | 2.4                 | 6.6         | Formatted: Font: Not Bold |
| K Revised total costs of admissions                                         | \$3,158     | \$631,650   | \$628,443          | \$329,200   | \$240,813   | \$61,637    | \$58,430            | \$139,071   | Formatted: Font: Not Bold |
| L Incremental cost for universal prophylaxis                                | \$4,356,360 | \$2,582,875 | \$1,914,604        | (\$493,306) | \$594,139   | \$2,482,042 | \$1,813,771         | \$984,410   | Formatted: Font: Not Bold |
| M Incremental cost per HAP                                                  | \$698,135   | \$63,680    | \$48,130           | (\$28,747)  | \$42,318    | \$265,175   | \$211,395           | \$42,069    | Formatted: Font: Not Bold |
| N NNT to prevent one RSV admission                                          | 77.2        | 13.1        | 11.5               | 4.3         | 11.4        | 31.8        | 26.0                | 7.0         | Formatted: Font: Not Bold |
| <b>Model with 96% effectiveness for healthy term infants</b>                |             |             |                    |             |             |             |                     |             |                           |
| O Revised total number of RSV admissions                                    | 0.3         | 2.1         | 2.0                | 0.9         | 0.7         | 0.5         | 0.4                 | 1.2         | Formatted: Font: Not Bold |
| P Revised total costs of admissions                                         | \$574       | \$114,845   | \$114,262          | \$59,855    | \$43,784    | \$11,207    | \$10,624            | \$25,286    | Formatted: Font: Not Bold |
| Q Incremental cost for universal prophylaxis                                | \$4,353,776 | \$2,066,070 | \$1,400,423        | (\$762,652) | \$397,111   | \$2,431,611 | \$1,765,965         | \$870,625   | Formatted: Font: Not Bold |
| R Incremental cost per HAP                                                  | \$566,898   | \$41,388    | \$28,603           | (\$36,110)  | \$22,981    | \$211,077   | \$167,231           | \$30,230    | Formatted: Font: Not Bold |
| S NNT to prevent one RSV admission                                          | 62.7        | 10.7        | 9.3                | 3.5         | 9.2         | 25.8        | 21.1                | 5.7         | Formatted: Font: Not Bold |

1  
2  
3  
4  
5  
6  
7  
8  
9  
10  
11  
12  
13  
14  
15  
16  
17  
18  
19  
20  
21  
22  
23  
24  
25  
26  
27  
28  
29  
30  
31  
32  
33  
34  
35  
36  
37  
38  
39  
40  
41  
42  
43  
44  
45  
46  
47  
48  
49

\*Healthy term births estimated to be 92% of all births – Data on total births obtained from Statistics Canada  
\*\*RSV admissions Jan 1<sup>st</sup> –June 30<sup>th</sup> 2009, with population at risk of healthy term infants born after July 1<sup>st</sup> 2008 to May 31<sup>st</sup> 2009  
NT= Northwest Territories,  
NU= Nunavut,  
KTR= Kitikmeot Region, Nunavut,  
KQR=Kivalliq Region, Nunavut,  
QIR= Qikiqitani Region, Nunavut,  
NNT=Number needed to treat  
HAP= hospital admissions prevented =C-J and C-O  
K=78% x H, P=96% X H  
L=K+I-H, Q=P+I-H,  
M=L/J, R=Q/O

Confidential

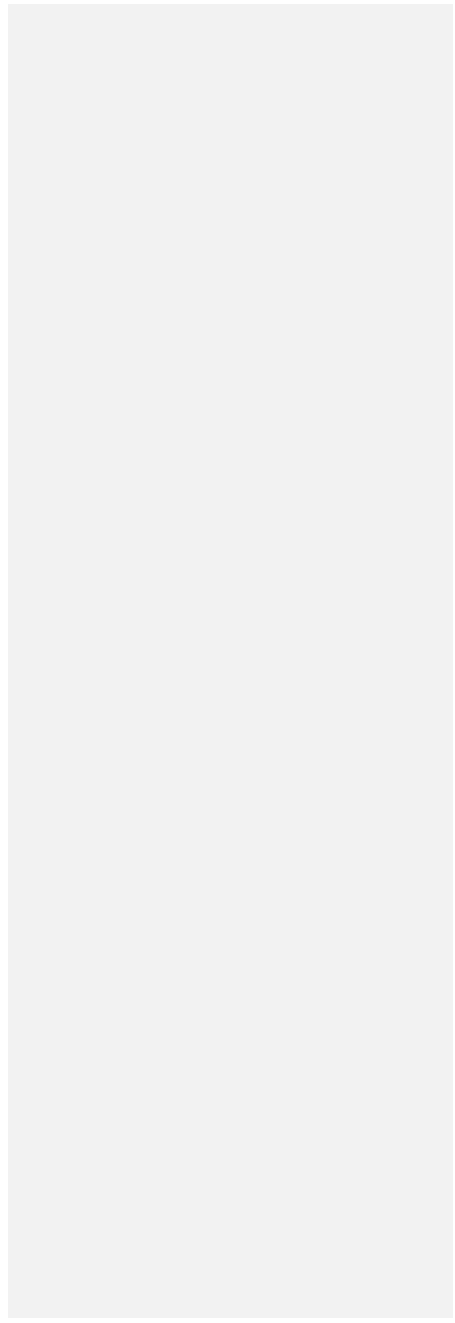



Table 4: Model B palivizumab prophylaxis for health term infants who were less than 6 months of age during the 2009 RSV season comparing 78% and 96% palivizumab effectiveness across the Canadian Arctic

|                                                                   | Location                                                                           | NT          | NU          | NU without-<br>Iqaluit | KTR         | KQR        | QIR         | QIR without<br>Iqaluit | NK        |
|-------------------------------------------------------------------|------------------------------------------------------------------------------------|-------------|-------------|------------------------|-------------|------------|-------------|------------------------|-----------|
| A                                                                 | Total annual births in 2009                                                        | 739         | 816         | 701                    | 114         | 245        | 457         | 342                    | 250       |
| B                                                                 | Healthy term births*                                                               | 679.9       | 750.7       | 644.9                  | 104.9       | 225.4      | 420.4       | 314.6                  | 230       |
| C                                                                 | Total number of RSV admissions documented in 2009 in healthy term infants          | 8           | 42          | 34                     | 17          | 14         | 11          | 10                     | 24        |
| E                                                                 | Rate of RSV in healthy infants <6 months age Jan to June 2009 per 1000 live births | 23.5        | 111.9       | 105.4                  | 324.1       | 124.2      | 52.3        | 63.6                   | 208.7     |
| F                                                                 | Number of doses of palivizumab                                                     | 2040        | 2252        | 1935                   | 315         | 676        | 1261        | 944                    | 690       |
| <b>Estimated Costs for RSV admissions in healthy term infants</b> |                                                                                    |             |             |                        |             |            |             |                        |           |
| G                                                                 | Average cost per admission                                                         | \$22,157    | \$58,955    | \$60,037               | \$73,861    | \$68,922   | \$23,232    | \$24,097               | \$23,830  |
| H                                                                 | Total cost of admissions Total                                                     | \$177,256   | \$2,476,100 | \$2,461,523            | \$1,255,638 | \$964,915  | \$255,547   | \$240,971              | \$571,929 |
| I                                                                 | Estimated cost of palivizumab                                                      | \$2,683,762 | \$2,963,231 | \$2,545,607            | \$414,071   | \$889,719  | \$1,659,441 | \$1,241,817            | \$907,877 |
| <b>Model with 78% effectiveness for healthy term infants</b>      |                                                                                    |             |             |                        |             |            |             |                        |           |
| J                                                                 | Revised total number of RSV admissions                                             | 1.8         | 9.2         | 7.5                    | 3.7         | 3.1        | 2.4         | 2.2                    | 5.3       |
| K                                                                 | Revised total costs of admissions                                                  | \$38,996    | \$544,742   | \$541,535              | \$276,240   | \$212,281  | \$56,220    | \$53,014               | \$125,824 |
| L                                                                 | Incremental cost for universal prophylaxis                                         | \$2,545,503 | \$1,031,873 | \$625,619              | (\$565,327) | \$137,086  | \$1,460,114 | \$1,053,860            | \$461,772 |
| M                                                                 | Incremental cost per HAP                                                           | \$407,933   | \$31,498    | \$23,590               | (\$42,634)  | \$12,554   | \$170,176   | \$135,110              | \$24,667  |
| N                                                                 | NNT to prevent one RSV admission                                                   | 54.5        | 11.5        | 12.2                   | 4.0         | 10.3       | 24.5        | 20.2                   | 6.1       |
| <b>Model with 96% effectiveness in healthy term infants</b>       |                                                                                    |             |             |                        |             |            |             |                        |           |
| O                                                                 | Revised total number of RSV admissions                                             | 0.3         | 1.7         | 1.4                    | 0.7         | 0.6        | 0.4         | 0.4                    | 1.0       |
| P                                                                 | Revised total costs of admissions                                                  | \$7,090     | \$99,044    | \$98,461               | \$50,226    | \$38,597   | \$10,222    | \$9,639                | \$22,877  |
| Q                                                                 | Incremental cost for universal prophylaxis                                         | \$2,513,597 | \$586,175   | \$182,545              | (\$791,342) | (\$36,599) | \$1,414,116 | \$1,010,486            | \$358,825 |
| R                                                                 | Incremental cost per HAP                                                           | \$327,291   | \$14,538    | \$5,593                | (\$48,489)  | (\$2,723)  | \$133,912   | \$105,259              | \$15,574  |
| S                                                                 | NNT to prevent one RSV admission                                                   | 44.3        | 9.3         | 9.9                    | 3.2         | 8.4        | 19.9        | 16.4                   | 5.0       |

Model B, all healthy term infants per prophylaxed if they were less than 6 months of age during the RSV season January 1<sup>st</sup> to June 30<sup>th</sup> 2009

\*Healthy births =92% of all births

1  
2  
3  
4  
5  
6  
7  
8  
9  
10  
11  
12  
13  
14  
15  
16  
17  
18  
19  
20  
21  
22  
23  
24  
25  
26  
27  
28  
29  
30  
31  
32  
33  
34  
35  
36  
37  
38  
39  
40  
41  
42  
43  
44  
45  
46  
47  
48  
49

NT= Northwest Territories,  
NU= Nunavut,  
KTR= Kitikmeot Region,  
KQR=Kivalliq Region,  
QIR= Qikiqitani Region,  
NNT=Number needed to treat  
HAP= hospital admissions prevented =c-J  
K=78% x H, P=96% X H  
L=K+I-H, Q=P+I-H,  
M=L/J, R=Q/O

Confidential
